CORRECTION

## Correction: Pathogen group-specific risk factors for intramammary infection in water buffalo

Shuvo Singha, Gerrit Koop, Md. Mizanur Rahman, Fabrizio Ceciliani, Maria Filippa Addis, Md. Matiar Rahman Howlader, Mohammed Kawser Hossain, Renata Piccinini, Clara Locatelli, Ylva Persson, Valerio Bronzo

In the Abstract, there are errors in the tenth sentence. The correct sentence is: Twice daily milking (OR: 3.1) and own stock buffalo (OR: 2.0) were associated with IMI by any pathogen.

In the Funding Statement, there is an error in Dr. Ylva Persson's listed affiliation. The correct affiliation is: Dr. Ylva Persson is currently working as State Veterinarian in Swedish Veterinary Agency is the author who was awarded the grant.

### Reference

1. Singha S, Koop G, Rahman MM, Ceciliani F, Addis MF, Howlader MMR, et al. Pathogen group-specific risk factors for intramammary infection in water buffalo. PLoS One. 2024;19(4):e0299929. <https://doi.org/10.1371/journal.pone.0299929> PMID: [38573969](https://pubmed.ncbi.nlm.nih.gov/38573969/)

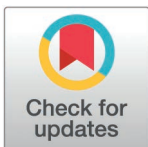

### OPEN ACCESS

**Citation:** Singha S, Koop G, Rahman MM, Ceciliani F, Addis MF, Howlader MMR, et al. (2025) Correction: Pathogen group-specific risk factors for intramammary infection in water buffalo. PLoS One 20(10): e0334533. <https://doi.org/10.1371/journal.pone.0334533>

**Published:** October 13, 2025

**Copyright:** © 2025 Singha et al. This is an open access article distributed under the terms of the [Creative Commons Attribution License](https://creativecommons.org/licenses/by/4.0/), which permits unrestricted use, distribution, and reproduction in any medium, provided the original author and source are credited.
